# Supplementary material for: Delving deeper: Relating the behaviour of a metabolic system to the properties of its components using symbolic metabolic control analysis
Source: PLOS journal article supplement (doi:10.1371/journal.pone.0207983), 2018-11-28
Supplement: S3 (10.1371/journal.pone.0207983.s003) [file journal.pone.0207983.s003]

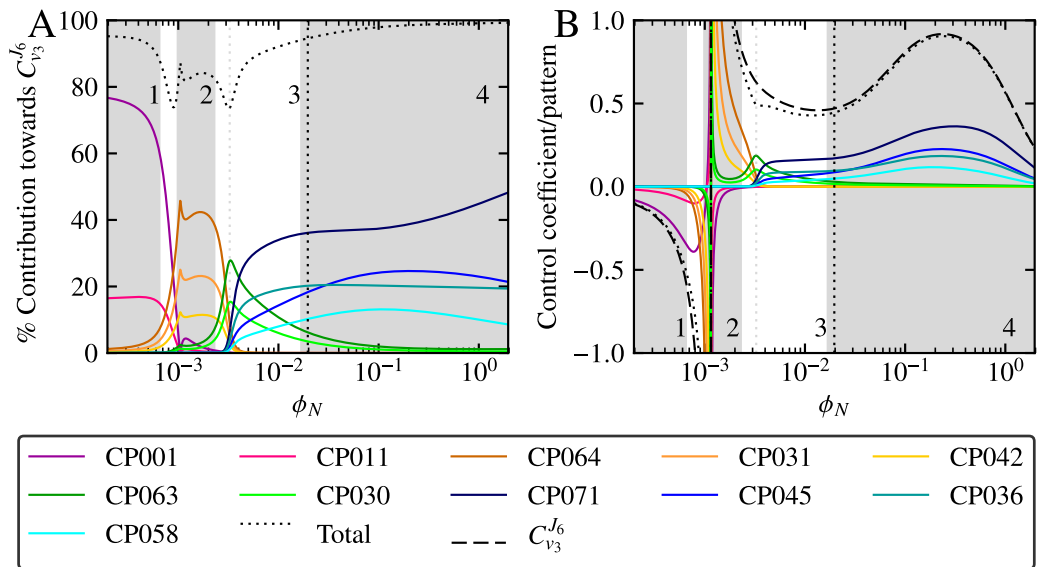

**S2 Fig.:** The most important control patterns of  $C_{v_3}^{J_6}$  as functions of  $\phi_N$  after alteration of  $K_{eq}$  of reaction 11. This figure is a recreation of Fig. 3 in the main text that shows the effects of replacing reaction 11 with a hypothetical reaction with a 1000-fold larger  $K_{eq}$  value. For more details see the original figure. (A) The most important control patterns shown in relation to the value of  $C_{v_3}^{J_6}$  and the value of their total sum. (B) The absolute percentage contribution of the most important control patterns relative to the absolute sum of the values of all  $C_{v_3}^{J_6}$  control patterns. Control patterns and  $C_{v_3}^{J_6}$  are indicated in the key. Comparing this figure to Fig. 3 in the main text reveals them to be identical in spite of the change in reaction 11.
