# Supplementary material for: Delving deeper: Relating the behaviour of a metabolic system to the properties of its components using symbolic metabolic control analysis
Source: PLOS journal article supplement (doi:10.1371/journal.pone.0207983), 2018-11-28
Supplement: S6 (10.1371/journal.pone.0207983.s006) [file journal.pone.0207983.s006]

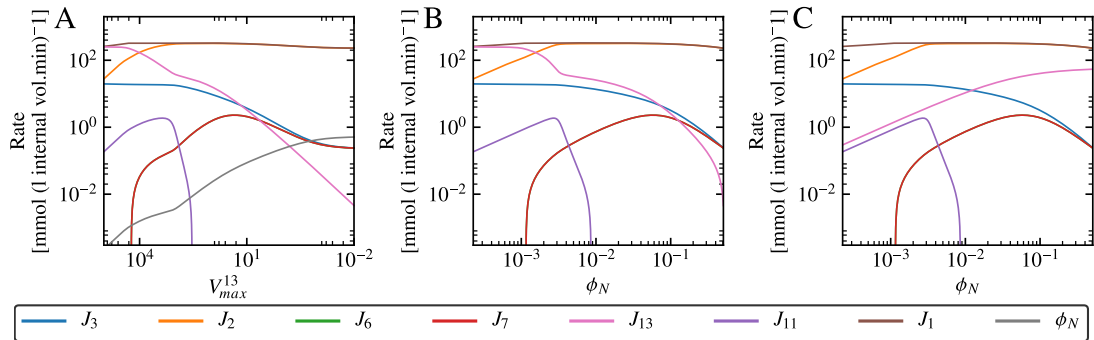

**S5 Fig.: Rate characteristic plots of the reaction block fluxes of  $\phi_N$ .** Each plot shows the same basic results, with each being generated in different manner. (A) These results were generated by modulating the activity of NADH oxidase in order to indirectly alter  $\phi_N$  in the free-NADH/NAD<sup>+</sup> model. (B) The results of (A) plotted against  $\phi_N$ . (C) This rate characteristic was generated in the fixed-NADH/NAD<sup>+</sup> model by directly modulating  $\phi_N$  over the same range as produced by modulating  $V_{max}^{13}$  in (A). Comparing (B) and (C) reveals that in spite the structural difference between the two models caused by fixing  $\phi_N$ , there is no difference in the flux responses of the two models, besides for  $J_{13}$  which consists solely of NADH oxidase. There are, however, differences in the control coefficients as demonstrated in S4 Fig.
